# Supplementary material
Source: PubMed Central journal article supplement (PMC2800924)

Examples of stimuli used in the experiment. In each category of objects, both subordinate categories are represented: For airplanes (top two rows), combat jets and civil airliners, for cars, European and Japanese makers (center two rows), and for faces, Israeli and Chinese (bottom two rows). Stimuli are presented in the different spatial frequency scale conditions: broadband (left column), high-pass filtered (center column), and low-pass filtered (right column).

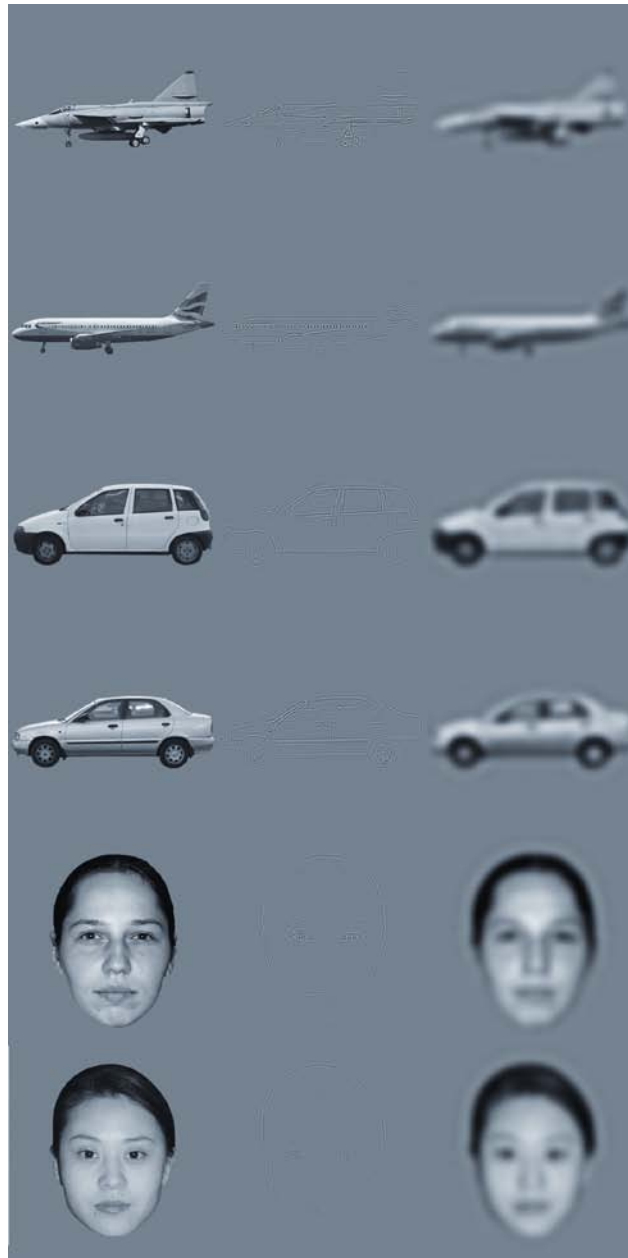

Supplement: NIHMS161165-supplement-Supplemental_Data.pdf [file NIHMS161165-supplement-Supplemental_Data.pdf]
